# Supplementary material
Source: PubMed Central journal article supplement (PMC11262134)
Supplement: NIHMS2006188-supplement-Supplement.pdf [file NIHMS2006188-supplement-Supplement.pdf]

## ONLINE SUPPLEMENTAL MATERIALS

**Figure S1. Study accrual flow chart**

**Figure S2. Primary mediational path analysis with the sample of past 30-day cigarette nonusers at baseline**

**Figure S3. Primary mediational path analysis with the sample including lifetime nonusers**

**Figure S4. Primary mediational path analysis using an alternative outcome of cigarette use quantity per day**

**Table S1. Sociodemographics of participants included in (vs. excluded from) the primary analytic sample**

**Table S2. Distribution of e-cigarette and cannabis use at study baseline**

**Table S3: Mediational pathways linking e-cigarette and cannabis dual use (T1) to cigarette use (T3) via cigarette use and nicotine dependence (T2)**

**Table S4: Prevalence of past 30-day any combustible cigarette use by e-cigarette and cannabis dual use status**

**Table S5: Mode of Cannabis use at study baseline (T1) among past-30 day cannabis users**

**Figure S1. Study accrual flow chart**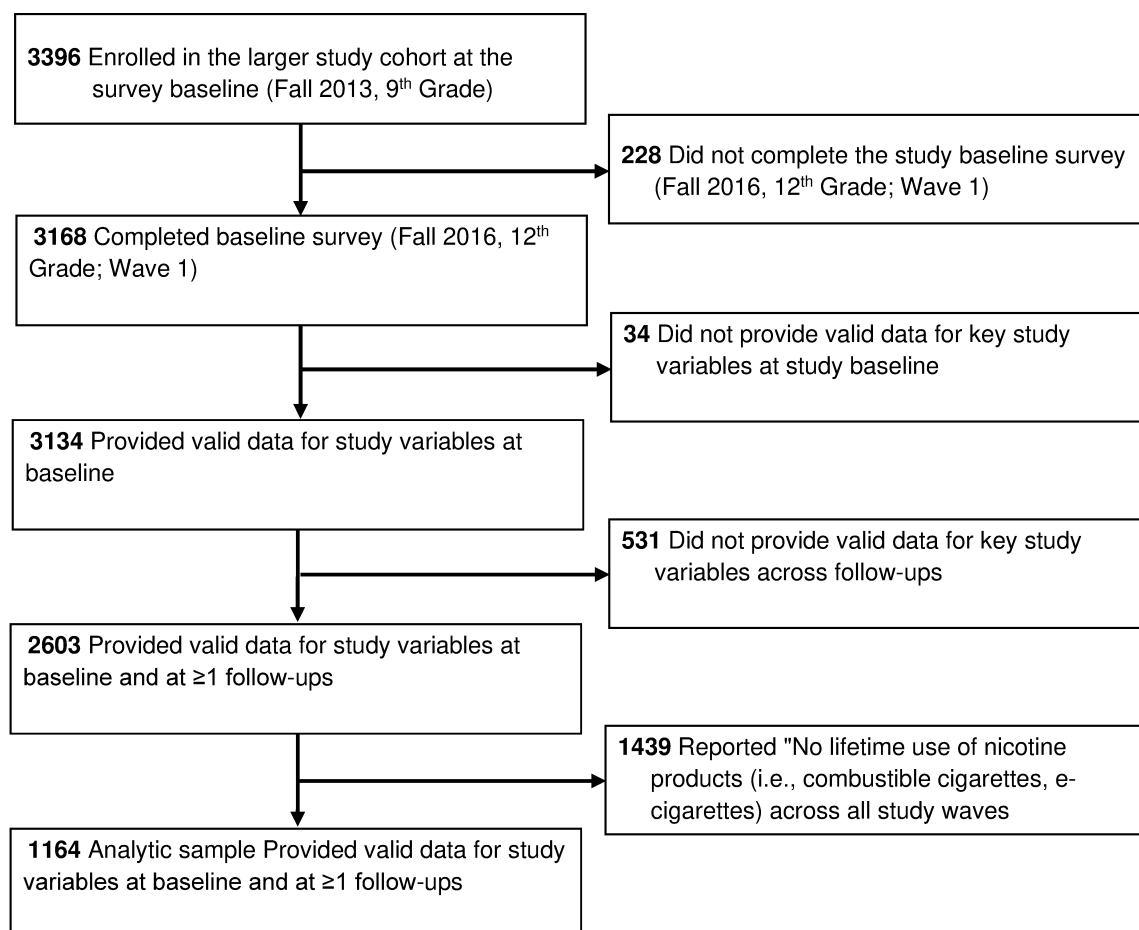

Figure S2. Primary mediational path analysis, restricted to past 30-day cigarette nonusers at baseline<sup>a</sup>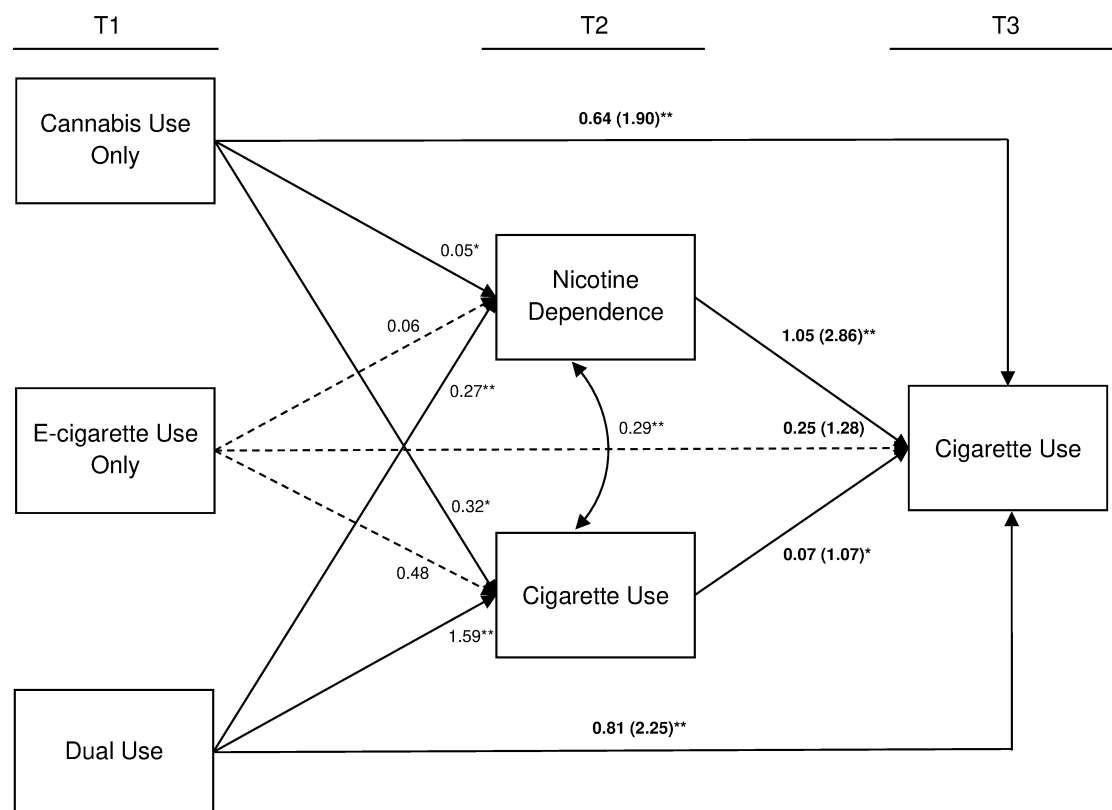

<sup>a</sup>Analytic sample N = 1057 (Baseline past 30-day cigarette nonusers; 91.3% of primary analytic sample). Negative binomial regression model in path analysis adjusting for all covariates (e.g., age, gender, race/ethnicity) presented in Table 1 and past-co day use of other tobacco products. Reference group of dual cannabis and e-cigarette use status at T1 was 'No use'. Estimates on pathways linking T1 to T2 were unstandardized regression coefficients (bs). Estimates on pathways (bold text) linking T1/T2 to T3 were unstandardized regression coefficients (bs) with rate ratios (RRs).

\*\*p<.001; \*p<.05 (two-tailed).

Figure S3. Primary mediational path analysis with the sample including lifetime non-users<sup>a</sup>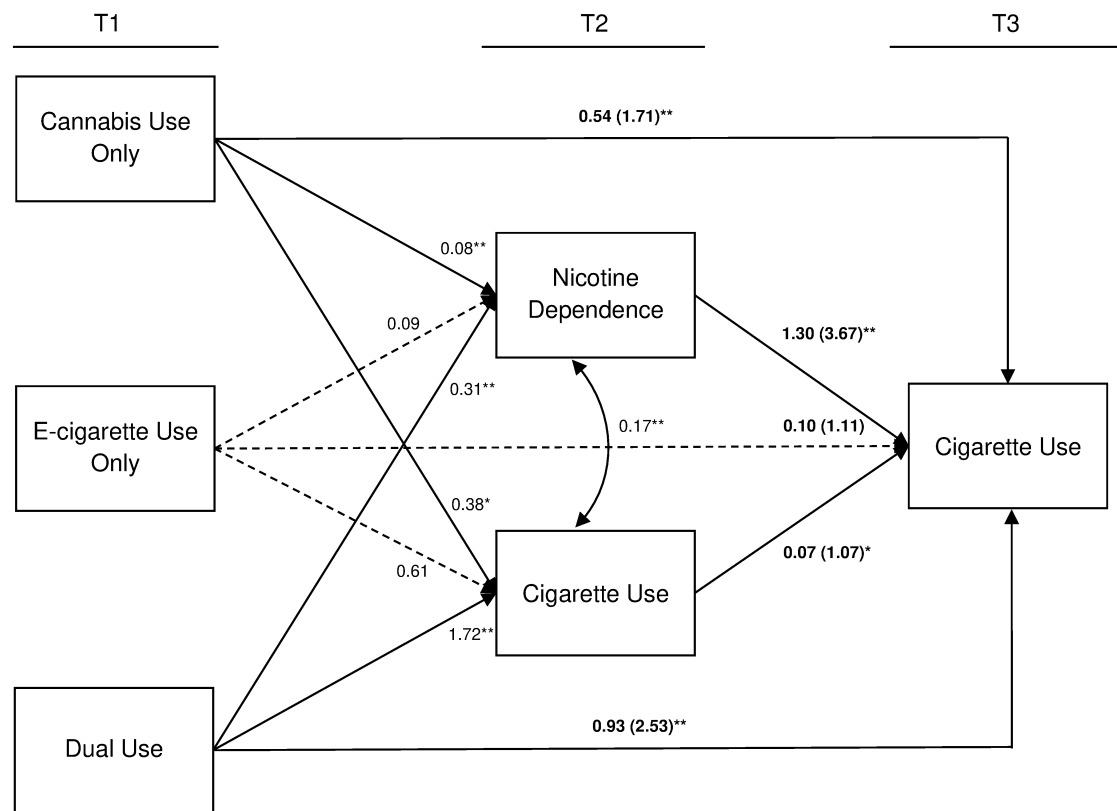

<sup>a</sup>Analytic sample N = 2603 (Participants who provided valid data of study variables at baseline and at  $\geq 1$  follow-ups). Negative binomial regression model in path analysis adjusting for all covariates (e.g., age, gender, race/ethnicity) presented in Table 1. Reference group of dual cannabis and e-cigarette use status at T1 was 'No use'. Estimates on pathways linking T1 to T2 were unstandardized regression coefficients (bs). Estimates on pathways (bold text) linking T1/T2 to T3 were unstandardized regression coefficients (bs) with rate ratios (RRs).

\*\*p<.001; \*p<.05 (two-tailed).

**Figure S4. Primary mediational path analysis using an alternative outcome of cigarette use quantity per day<sup>a</sup>**

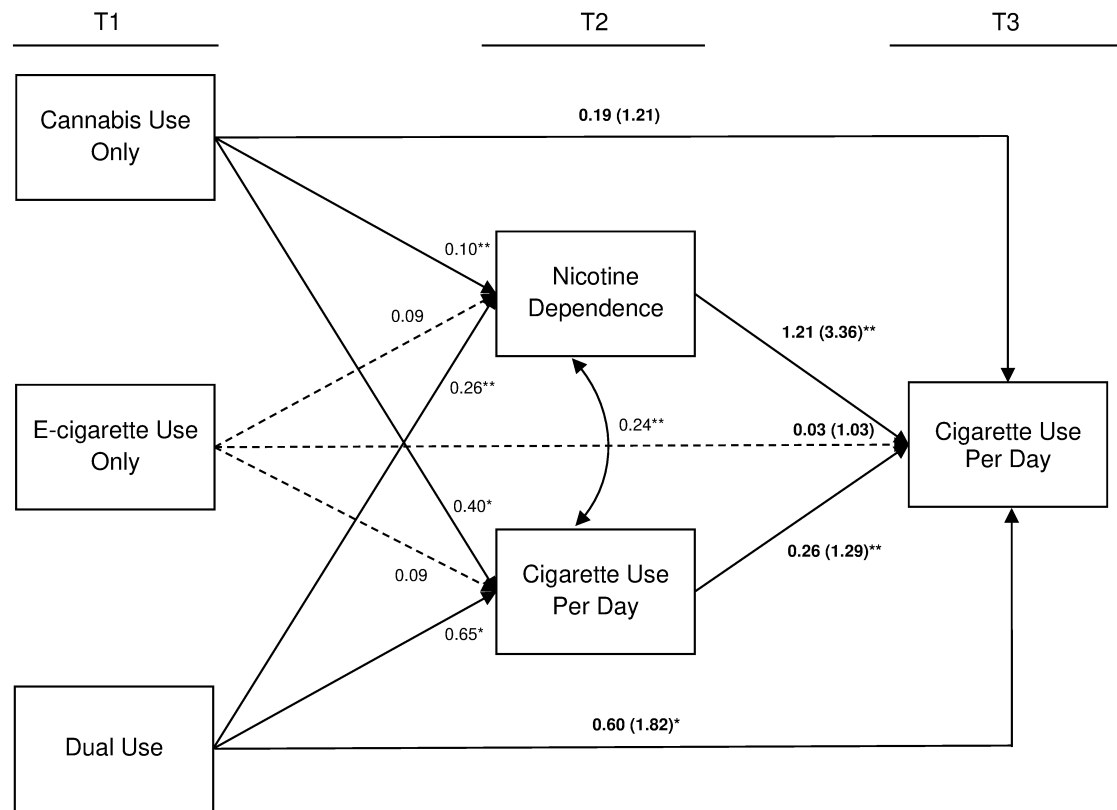

<sup>a</sup>Analytic sample N = 1164. Cigarette use per day outcome (i.e., number of cigarettes smoked per smoking day; range=0-20). Negative binomial regression model in path analysis adjusting for all sociodemographic factors (e.g., age, gender, race/ethnicity, and socioeconomic status) and baseline cigarette use frequency per day in the past 30 days or other tobacco products and nicotine dependence) presented in Table 1. Reference group of dual cannabis and e-cigarette use status at T1 was 'No use'. Estimates on pathways linking T1 to T2 were unstandardized regression coefficients (bs). Estimates on pathways (bold text) linking T1/T2 to T3 were unstandardized regression coefficients (bs) with rate ratios (RRs).

\*\*p<.001; \*p<.05 (two-tailed).

**Table S1. Sociodemographics of participants included in (vs. excluded from) the primary analytic sample<sup>a</sup>**

| Sociodemographics                                                  | Analytic sample Provided valid data for study variables at baseline and at $\geq 1$ follow-ups (N=1164) <sup>b</sup> | Excluded from the analysis (N=2232) <sup>c</sup> | Reported "No use of nicotine products (i.e., combustible cigarettes, e-cigarettes) across all study waves (N=1439) <sup>d</sup> |
|--------------------------------------------------------------------|----------------------------------------------------------------------------------------------------------------------|--------------------------------------------------|---------------------------------------------------------------------------------------------------------------------------------|
| Female gender (vs. Male), N (%)                                    | 655 (56.3)                                                                                                           | 1158 (51.9)*                                     | 845 (58.7)                                                                                                                      |
| Age, M (SD), year                                                  | 17.49 (0.41)                                                                                                         | 17.50 (0.41)                                     | 17.45 (0.38)                                                                                                                    |
| Race/ethnicity, N (%)                                              |                                                                                                                      |                                                  |                                                                                                                                 |
| Hispanic                                                           | 609 (53.6)                                                                                                           | 996 (45.5)**                                     | 607 (42.7)**                                                                                                                    |
| Asian                                                              | 127 (11.2)                                                                                                           | 433 (19.8)**                                     | 339 (23.8)**                                                                                                                    |
| African American                                                   | 46 (4.0)                                                                                                             | 120 (5.5)                                        | 69 (4.8)                                                                                                                        |
| Non-Hispanic White                                                 | 191 (16.8)                                                                                                           | 353 (16.1)                                       | 236 (16.6)                                                                                                                      |
| Other <sup>e</sup>                                                 | 163 (14.3)                                                                                                           | 288 (13.2)                                       | 172 (12.1)                                                                                                                      |
| Parents graduated college (vs. less education), N (%) <sup>f</sup> | 446 (43.7)                                                                                                           | 1036 (54.2)**                                    | 752 (59.4)**                                                                                                                    |

<sup>a</sup>N=3396; Participants enrolled in the parent study cohort in 9th grade of fall 2013 during high school.

<sup>b</sup>Available data (Ns=1021-1164).

<sup>c</sup>Available data (Ns=1910-2232).

<sup>d</sup>Available data (Ns=1265-1439).

<sup>e</sup>Other: 'American Indian/Alaskan Native', 'Native Hawaiian/Pacific Islander', or 'Multiethnic/Multiracial'.

<sup>f</sup>Participants who marked 'don't know' response (N=465) recoded as missing

\*\*p<.001; \*p<.05 (two-tailed). Calculated using one-way Analysis of Variance (ANOVA) for continuous variables and  $\chi^2$  test for categorical variables (Reference = Analytic sample).

**Table S2: Distribution of e-cigarette and cannabis use at study baseline**

| Past 30-day use at baseline | Total analytic sample (N=1164) |                   | Any e-cigarette or cannabis users (N=419) |                   |
|-----------------------------|--------------------------------|-------------------|-------------------------------------------|-------------------|
|                             | E-cigarette use n(%)           | Cannabis use n(%) | E-cigarette use n(%)                      | Cannabis use n(%) |
| 0 days                      | 1049 (90.1)                    | 774 (66.5)        | 304 (72.6)                                | 29 (6.9)          |
| 1-2 days                    | 53 (4.6)                       | 156 (13.4)        | 53 (12.6)                                 | 156 (37.2)        |
| 3-5 days                    | 27 (2.3)                       | 57 (4.9)          | 27 (6.4)                                  | 57 (13.6)         |
| 6-9 days                    | 6 (0.5)                        | 43 (3.7)          | 6 (1.4)                                   | 43 (10.3)         |
| 10-19 days                  | 9 (0.8)                        | 55 (4.7)          | 9 (2.1)                                   | 55 (13.1)         |
| 20-29 days                  | 8 (0.7)                        | 41 (3.5)          | 8 (1.9)                                   | 41 (9.8)          |
| All 30 days                 | 12 (1.0)                       | 38 (3.3)          | 12 (2.9)                                  | 38 (9.1)          |

**Table S3. Mediation pathways linking e-cigarette and cannabis use (T1) to cigarette use (T3) via cigarette use and nicotine dependence (T2)<sup>a</sup>**

|                                 | Total Effect Model <sup>b</sup>                          |  | Mediation Path Model <sup>b</sup>                        |                                                          |                                                                |                                                        |                                                              |
|---------------------------------|----------------------------------------------------------|--|----------------------------------------------------------|----------------------------------------------------------|----------------------------------------------------------------|--------------------------------------------------------|--------------------------------------------------------------|
|                                 | Dual use status T1<br>→<br>Cigarette use T3 <sup>d</sup> |  | Dual use status T1<br>→<br>Cigarette use T3 <sup>d</sup> | Dual use status T1<br>→<br>Cigarette use T2 <sup>e</sup> | Dual use status T1<br>→<br>Nicotine dependence T2 <sup>e</sup> | Cigarette use T2<br>→<br>Cigarette use T3 <sup>d</sup> | Nicotine dependence T2<br>→<br>Cigarette use T3 <sup>d</sup> |
| Dual use status T1 <sup>c</sup> | RR (95%CI)                                               |  | RR (95%CI)                                               | b (95%CI)                                                | b (95%CI)                                                      | RR (95%CI)                                             | RR (95%CI)                                                   |
| No use                          | REF                                                      |  | REF                                                      | REF                                                      | REF                                                            |                                                        |                                                              |
| Cannabis use only               | 2.58 (1.43, 4.98)                                        |  | 2.28 (1.33, 3.88)                                        | 0.38 (0.18, 0.57)                                        | 0.08 (0.05, 0.11)                                              | 1.07 (1.02, 1.13)                                      | 3.67 (2.32, 6.01)                                            |
| E-cigarette use only            | 2.61 (1.04, 13.07)                                       |  | 2.19 (0.98, 11.72)                                       | 0.49 (-0.04, 1.05)                                       | 0.11 (-0.02, 0.25)                                             |                                                        |                                                              |
| Dual use                        | 5.84 (3.16, 12.81)                                       |  | 3.51 (1.12, 10.01)                                       | 1.50 (0.97, 2.03)                                        | 0.31 (0.19, 0.43)                                              |                                                        |                                                              |

<sup>a</sup>Analytic sample N = 1164.

<sup>b</sup>Negative binomial regression model in path analysis adjusting for sociodemographic factors (age, gender, race/ethnicity, and socio-economic status) and baseline past 30-day cigarette or other tobacco product use and nicotine dependence) presented in Table 1.

<sup>c</sup>Reference group of dual cannabis and e-cigarette use status at T1 was 'No use'.

<sup>d</sup>Estimates on pathways linking T1/T2 to T3 were rate ratio (RR) with 95% confidence interval (95%CI).

<sup>e</sup>Estimates on pathways linking T1 to T2 were unstandardized regression coefficients (b) with 95%CIs.



**Table S4: Prevalence of past 30-day any combustible cigarette use by e-cigarette and cannabis dual use status<sup>a</sup>**

| Any smoking (1+ days) in the past 30 days | No use<br>(N=754) | Cannabis use only<br>(N=304) | E-cigarette use only<br>(N=29) | Dual use<br>(N=86) |
|-------------------------------------------|-------------------|------------------------------|--------------------------------|--------------------|
|                                           | n (%)             | n (%)                        | n (%)                          | n (%)              |
| Cigarette use T1                          | 23 (3.1)          | 45 (15.0)                    | 4 (13.8)                       | 29 (34.1)          |
| Cigarette use T2                          | 53 (7.4)          | 50 (17.2)                    | 6 (21.4)                       | 27 (32.9)          |
| Cigarette use T3                          | 58 (8.8)          | 34 (13.1)                    | 4 (15.4)                       | 21 (31.4)          |

<sup>a</sup>Analytic sample N = 1164.

**Table S5: Mode of Cannabis use at study baseline (T1) among past 30-day cannabis users<sup>a</sup>**

| <b>Past 30-day cannabis use</b> | <b>N</b> | <b>%</b> |
|---------------------------------|----------|----------|
| Any cannabis use                |          |          |
| Combustible                     | 362      | 92.8     |
| Blunts                          | 269      | 69.0     |
| Vaped                           | 126      | 32.3     |
| Dabbing                         | 121      | 31.0     |
| Edible                          | 182      | 46.7     |
| Inhalation vs. Oral products    |          | 0.0      |
| Inhalation only <sup>b</sup>    | 202      | 51.8     |
| Oral only <sup>c</sup>          | 15       | 3.8      |
| Both                            | 167      | 42.8     |

N=1164. <sup>a</sup>Among past 30-day any cannabis product users (Denominator N = 390). <sup>b</sup>Includes combustible, blunts, vaped, and dabbing products. <sup>c</sup>Includes edible product.
